# Supplementary material for: Identification of ovarian cancer associated genes using an integrated approach in a Boolean framework
Source: PubMed Central journal article supplement (PMC3605242; doi:10.1186/1752-0509-7-12), 2013-02-06
Supplement: 1752-0509-7-12-S2.pdf [file 1752-0509-7-12-S2.pdf]

**Identification of ovarian cancer associated genes using an integrated approach in a Boolean framework  
by Gaurav Kumar, Edmond J. Breen and Shoba Ranganathan**

**Additional File 2**

Differential/Non-differential gene expression data analysis for the seven functional attributes.

| Functional Attributes          |   | Differential gene expression |       |       |           | Non-differential gene expression |       |       |           |
|--------------------------------|---|------------------------------|-------|-------|-----------|----------------------------------|-------|-------|-----------|
|                                |   | Average Rank                 | Min.  | Max.  | Odd-Ratio | Average Rank                     | Min.  | Max.  | Odd-Ratio |
| Secretome                      | + | 0.093                        | 0.000 | 0.698 | 2.111     | 0.051                            | 0.000 | 0.585 | 1.246     |
|                                | - | 0.044                        | 0.000 | 0.744 |           | 0.041                            | 0.000 | 0.776 |           |
| Protein kinase                 | + | 0.216                        | 0.037 | 0.608 | 5.194     | 0.196                            | 0.037 | 0.739 | 5.515     |
|                                | - | 0.042                        | 0.000 | 0.744 |           | 0.036                            | 0.000 | 0.776 |           |
| Tissue specificity             | + | 0.112                        | 0.038 | 0.744 | 3.647     | 0.102                            | 0.038 | 0.744 | 3.768     |
|                                | - | 0.031                        | 0.000 | 0.374 |           | 0.027                            | 0.000 | 0.766 |           |
| Post-translation modification  | + | 0.131                        | 0.039 | 0.744 | 6.389     | 0.126                            | 0.039 | 0.766 | 6.517     |
|                                | - | 0.021                        | 0.000 | 0.372 |           | 0.019                            | 0.000 | 0.393 |           |
| Transcription Factor           | + | 0.172                        | 0.047 | 0.735 | 3.909     | 0.169                            | 0.047 | 0.776 | 4.584     |
|                                | - | 0.044                        | 0.000 | 0.744 |           | 0.037                            | 0.000 | 0.744 |           |
| Protein-interaction (nodes >4) | + | 0.157                        | 0.049 | 0.744 | 5.744     | 0.146                            | 0.049 | 0.776 | 6.597     |
|                                | - | 0.027                        | 0.000 | 0.735 |           | 0.022                            | 0.000 | 0.369 |           |
| Methylation                    | + | 0.187                        | 0.073 | 0.744 | 4.388     | 0.148                            | 0.000 | 0.776 | 3.807     |
|                                | - | 0.043                        | 0.000 | 0.645 |           | 0.039                            | 0.000 | 0.645 |           |
