# Supplementary material for: Identification of ovarian cancer associated genes using an integrated approach in a Boolean framework
Source: PubMed Central journal article supplement (PMC3605242; doi:10.1186/1752-0509-7-12), 2013-02-06
Supplement: 1752-0509-7-12-S3.pdf [file 1752-0509-7-12-S3.pdf]

**Kf gpvlllec vlp'qhl'qxct lcp'ecpegt 'cuuqekcvgf 'i gpgu'wulpi 'cp'lpvi t cvgf ''  
 cr r t qcej 'lp'c'Dqqrgcp'lt co gy qtni'**

**d{ 'I cwt ex'Mwo ct.'Gf o qpf 'L0Dt ggp'cpf 'Uj qdc'Tcpi cpcvj cp''**

**Cf f ksqpcnHkg'5''**

Boolean-based probability score for ranking the 48 non-differentially expressed genes.

| <i>Gene symbol</i> | <i>Gene-ID</i> | <i>Boolean values</i> | <i>Rank</i> |
|--------------------|----------------|-----------------------|-------------|
| <i>ESR1</i>        | 2099           | 0001111               | 0.776265    |
| <i>PRLR</i>        | 5618           | 0011011               | 0.743532    |
| <i>WEE1</i>        | 7465           | 0101011               | 0.739246    |
| <i>SMAD2</i>       | 4087           | 0011110               | 0.644578    |
| <i>CDC5L</i>       | 988            | 0011110               | 0.644578    |
| <i>HIF1A</i>       | 3091           | 0011110               | 0.644578    |
| <i>BRCA1</i>       | 672            | 0011110               | 0.644578    |
| <i>JUNB</i>        | 3726           | 0011110               | 0.644578    |
| <i>RUNX1</i>       | 861            | 0011110               | 0.644578    |
| <i>BACH1</i>       | 571            | 0011110               | 0.644578    |
| <i>MAX</i>         | 4149           | 0011110               | 0.644578    |
| <i>GTF2A1</i>      | 2957           | 0011110               | 0.644578    |
| <i>SREBF1</i>      | 6720           | 0011110               | 0.644578    |
| <i>TP73</i>        | 7161           | 0011110               | 0.644578    |
| <i>CDK7</i>        | 1022           | 0101110               | 0.640294    |
| <i>AKT1</i>        | 207            | 0111010               | 0.607561    |
| <i>HIPK2</i>       | 28996          | 0111010               | 0.607561    |
| <i>ERBB2</i>       | 2064           | 0111010               | 0.607561    |
| <i>KIT</i>         | 3815           | 0111010               | 0.607561    |
| <i>JAK3</i>        | 3718           | 0111010               | 0.607561    |
| <i>TBK1</i>        | 29110          | 0111010               | 0.607561    |
| <i>PAK4</i>        | 10298          | 0111010               | 0.607561    |
| <i>MAP3K14</i>     | 9020           | 0111010               | 0.607561    |
| <i>BRD4</i>        | 23476          | 0111010               | 0.607561    |
| <i>TRIM28</i>      | 10155          | 0111010               | 0.607561    |
| <i>LATS1</i>       | 9113           | 0111010               | 0.607561    |
| <i>MAPK14</i>      | 1432           | 0111010               | 0.607561    |
| <i>STK11</i>       | 6794           | 0111010               | 0.607561    |

| <i>Gene symbol</i> | <i>Gene-ID</i> | <i>Boolean values</i> | <i>Rank</i> |
|--------------------|----------------|-----------------------|-------------|
| <i>TEC</i>         | 7006           | 0111010               | 0.607561    |
| <i>FGFR1</i>       | 2260           | 0111010               | 0.607561    |
| <i>STK16</i>       | 8576           | 0111010               | 0.607561    |
| <i>MAP3K5</i>      | 4217           | 0111010               | 0.607561    |
| <i>MAP3K7</i>      | 6885           | 0111010               | 0.607561    |
| <i>IKBKB</i>       | 3551           | 0111010               | 0.607561    |
| <i>PTK2</i>        | 5747           | 0111010               | 0.607561    |
| <i>PTK2B</i>       | 2185           | 0111010               | 0.607561    |
| <i>FGFR3</i>       | 2261           | 0111010               | 0.607561    |
| <i>JAK2</i>        | 3717           | 0111010               | 0.607561    |
| <i>ATR</i>         | 545            | 0111010               | 0.607561    |
| <i>FLT1</i>        | 2321           | 0111010               | 0.607561    |
| <i>FGFR2</i>       | 2261           | 0111010               | 0.607561    |
| <i>DYRK1A</i>      | 1859           | 0111010               | 0.607561    |
| <i>PRKCD</i>       | 5580           | 0111010               | 0.607561    |
| <i>ERBB4</i>       | 2066           | 0111010               | 0.607561    |
| <i>SRC</i>         | 6714           | 0111010               | 0.607561    |
| <i>SERPINA1</i>    | 5265           | 1011010               | 0.584684    |
| <i>SMAD1</i>       | 5265           | 1011010               | 0.584684    |
| <i>F2</i>          | 2147           | 1011010               | 0.584684    |
