# Supplementary material for: Identification of ovarian cancer associated genes using an integrated approach in a Boolean framework
Source: PubMed Central journal article supplement (PMC3605242; doi:10.1186/1752-0509-7-12), 2013-02-06
Supplement: 1752-0509-7-12-S7.pdf [file 1752-0509-7-12-S7.pdf]

**Identification of ovarian cancer associated genes using an integrated approach in a Boolean framework** by Gaurav Kumar, Edmond J. Breen and Shoba Ranganathan

**Co-expression gene network**

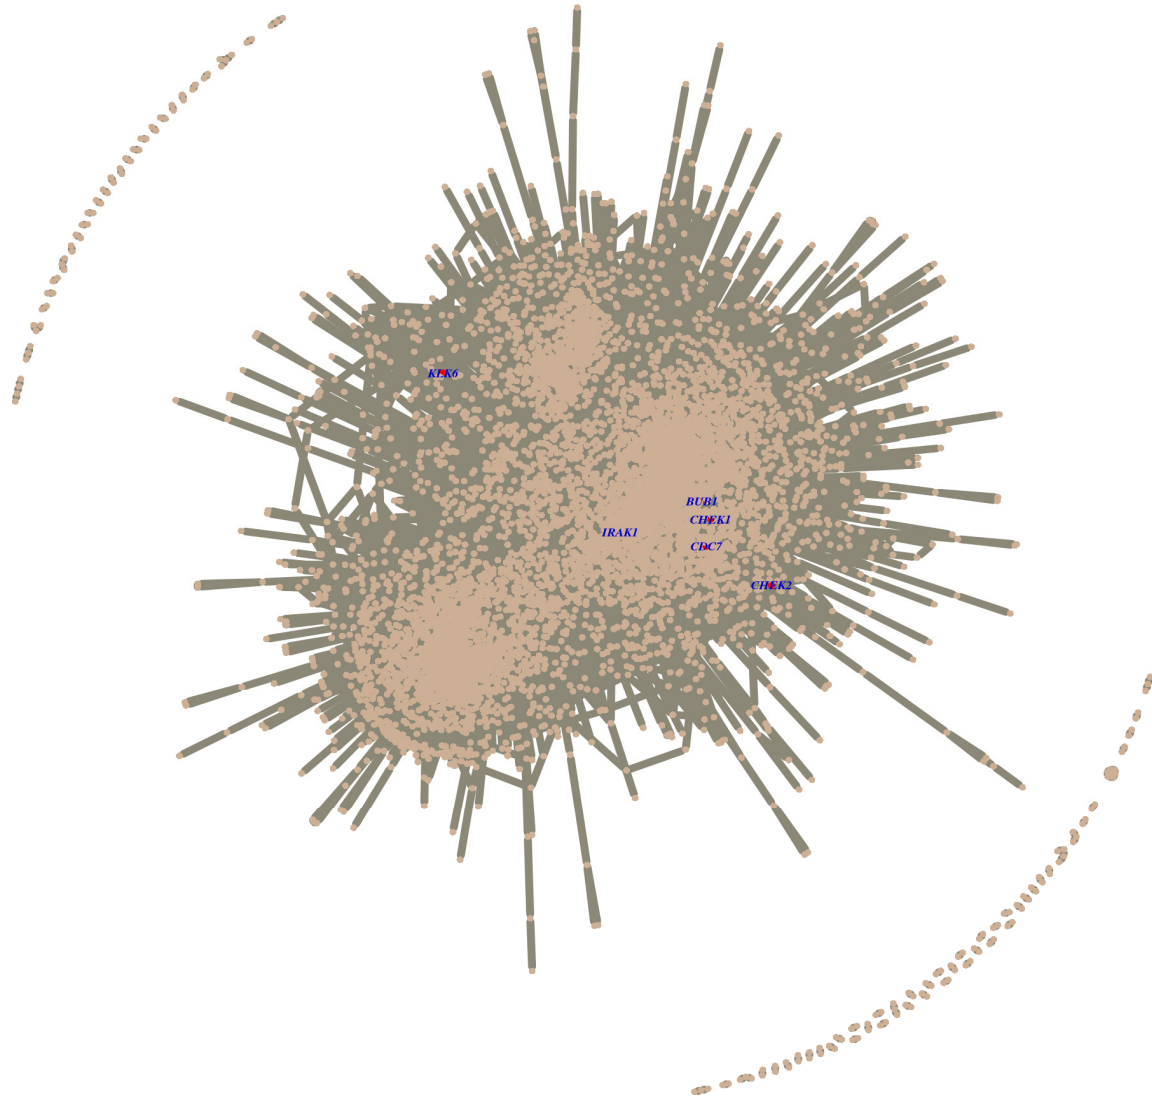

**Additional File 7: Co-expression gene network with Pearson's correlation coefficient > 0.5.**

Up-regulated genes (*IRAK1*, *CDC7*, *KLK6*, *BUB1*, *CHEK1*, and *CHEK2*) of the TCGA data are mapped as a co-expression network (GSE3149). *STC2* not represented as the average Pearson's co-correlation coefficient < 0.5
