# Supplementary material for: Identification of ovarian cancer associated genes using an integrated approach in a Boolean framework
Source: PubMed Central journal article supplement (PMC3605242; doi:10.1186/1752-0509-7-12), 2013-02-06
Supplement: 1752-0509-7-12-S8.pdf [file 1752-0509-7-12-S8.pdf]

## Identification of ovarian cancer associated genes using an integrated approach in a Boolean framework by Gaurav Kumar, Edmond J. Breen and Shoba Ranganathan

**Additional File 8:** GATHER [71] GO biological process annotations of the differentially expressed genes associated with the cancer hallmarks in Table 3.

Genes are annotated with GO terms using the GATHER enrichment method. B-factor (i.e. Bayes factor) quantifies the amount of evidence supporting the hypothesis that the annotation is associated with our genes. *p-values* and *q-values* are based on Fisher's exact test.

| <i>Cancer Hallmark</i>                                              | <i>GO Term Definition</i>                    | <i>GO Term-ID (GO-depth)</i> | <i>Genes</i>                                      | <i>ln(B-factor)</i> | <i>p-value</i> | <i>q-value</i> |
|---------------------------------------------------------------------|----------------------------------------------|------------------------------|---------------------------------------------------|---------------------|----------------|----------------|
| 1. Sustain growth signal                                            | negative regulation of cell proliferation    | GO:0008285 (6)               | CDC7; CHEK1; IGFBP7                               | 4.38                | 0.000724521    | 0.00937227     |
| 2. Escape growth suppressor i.e. Insensitivity to growth inhibitor  | regulation of cell proliferation             | GO:0042127 (5)               | CDC7; CHEK1; IGF1R; IGFBP7                        | 5.05                | 0.00037447     | 0.006219909    |
| 3. Active invasion and metastasis                                   | negative regulation of programmed cell death | GO:0043069 (6)               | IGF1R                                             | -0.82               | 0.135335283    | 0.227637688    |
| 4. Limitless replicative potential / Enable replicative immortality | cell proliferation                           | GO:0008283 (4)               | AR; BUB1; CDC7; CHEK1; CHEK2; DAB2; IGF1R; IGFBP7 | 7.45                | 3.53575E-05    | 0.001294022    |
| 5. Induces angiogenesis                                             | tissue regeneration                          | GO:0042246 (4)               | KLK6                                              | 2.6                 | 0.004127844    | 0.03337327     |
| 6. Resisting cell death                                             | anti-apoptosis                               | GO:0006916 (8)               | IGF1R                                             | -0.71               | 0.120031629    | 0.220909978    |
| 7. Genomic instability                                              | DNA damage checkpoint                        | GO:0000077 (7)               | CHEK1; CHEK2                                      | 6.54                | 8.02792E-05    | 0.001949856    |
| 8. Deregulate cellular energetics                                   | regulation of cellular physiological process | GO:0051244 (4)               | CDC7; CHEK1; IGF1R; IGFBP7                        | 2.26                | 0.006604527    | 0.039955058    |
| 9. Avoid immune destruction                                         |                                              |                              |                                                   |                     |                |                |
| 10. Tumor promoting inflammation                                    | wound healing                                | GO:0042060 (6)               | KLK6                                              | 2.09                | 0.006874063    | 0.040356613    |
